# Supplementary material
Source: MDPI journal article supplement (https://www.mdpi.com/2076-3263/13/10/305)
Supplement: s1 [file s1]

**Table S1.** Chemical compositions of rocks.

| Sample                           | L-15-13      | L-15-12       | L-15-11           | L-15-10      | L-15-1       | L-15-2            | L-15-3       | L-15-4              | L-15-5       | L-15-7           | L-15-8       | L-15-9       |
|----------------------------------|--------------|---------------|-------------------|--------------|--------------|-------------------|--------------|---------------------|--------------|------------------|--------------|--------------|
| Rock                             | Foyaite      | Foyaite       | Pegmatoid foyaite | Foyaite      | Foyaite      | High-grade fenite |              | Medium-grade fenite |              | Low-grade fenite |              |              |
| SiO <sub>2</sub>                 | 52.98        | 53.37         | 51.51             | 59.36        | 57.17        | 62.21             | 63.65        | 63.68               | 63.79        | 64.75            | 65.30        | 65.50        |
| TiO <sub>2</sub>                 | 0.56         | 0.43          | 1.21              | 0.67         | 0.75         | 0.47              | 0.45         | 0.50                | 0.49         | 0.51             | 0.44         | 0.46         |
| Al <sub>2</sub> O <sub>3</sub>   | 22.64        | 23.41         | 14.61             | 16.93        | 16.10        | 15.39             | 15.56        | 15.88               | 16.57        | 16.02            | 15.92        | 15.75        |
| Fe <sub>2</sub> O <sub>3</sub>   | 2.51         | 2.25          | 10.03             | 2.95         | 5.41         | 1.93              | 0.83         | 0.18                | 0.34         | 0.30             | 0.51         | 0.33         |
| FeO                              | 1.4          | 1.3           | 2.2               | 1.8          | 1.9          | 2.1               | 2.7          | 3.1                 | 2.8          | 3.0              | 2.5          | 3.3          |
| MnO                              | 0.15         | 0.13          | 0.31              | 0.19         | 0.18         | 0.08              | 0.05         | 0.07                | 0.06         | 0.05             | 0.06         | 0.05         |
| MgO                              | 0.26         | 0.24          | 0.89              | 0.39         | 0.69         | 2.02              | 2.38         | 2.63                | 2.21         | 2.38             | 2.23         | 2.27         |
| CaO                              | 0.95         | 0.67          | 2.14              | 0.81         | 1.22         | 3.03              | 3.69         | 4.43                | 4.08         | 3.69             | 3.65         | 3.14         |
| SrO                              | 0.14         | 0.16          | 0.16              | 0.21         | 0.17         | 0.20              | 0.24         | 0.22                | 0.23         | 0.21             | 0.22         | 0.21         |
| Na <sub>2</sub> O                | 9.73         | 9.94          | 9.88              | 6.41         | 7.31         | 7.56              | 6.85         | 6.96                | 6.83         | 6.47             | 6.59         | 6.22         |
| K <sub>2</sub> O                 | 6.02         | 5.79          | 2.83              | 8.08         | 6.30         | 3.06              | 1.39         | 0.60                | 0.51         | 0.82             | 0.58         | 0.72         |
| P <sub>2</sub> O <sub>5</sub>    | 0.05         | 0.05          | 0.06              | 0.01         | 0.09         | 0.46              | 0.54         | 0.29                | 0.25         | 0.24             | 0.18         | 0.24         |
| ΣREE <sub>2</sub> O <sub>3</sub> | 0.04         | 0.04          | 0.06              | 0.05         | 0.07         | 0.04              | 0.03         | 0.04                | 0.04         | 0.04             | 0.04         | 0.04         |
| S <sub>tot</sub>                 | 0.01         | 0.01          | 0.05              | 0.07         | 0.01         | 0.11              | 0.05         | 0.04                | 0.09         | 0.05             | 0.05         | 0.03         |
| Cl                               | 0.01         | 0.01          | 0.01              | 0.01         | 0.01         | 0.01              | 0.01         | 0.01                | 0.01         | 0.01             | 0.01         | 0.01         |
| F                                | 0.01         | 0.01          | 0.02              | 0.02         | 0.04         | 0.12              | 0.12         | 0.06                | 0.05         | 0.04             | 0.03         | 0.04         |
| H <sub>2</sub> O                 | 0.34         | 0.26          | 0.41              | 0.28         | 0.30         | 0.19              | 0.22         | 0.11                | 0.26         | 0.17             | 0.16         | 0.18         |
| LOI                              | 1.97         | 2.02          | 3.37              | 1.35         | 1.95         | 0.73              | 1.20         | 0.85                | 0.96         | 1.16             | 1.04         | 1.10         |
| <b>Sum</b>                       | <b>99.77</b> | <b>100.09</b> | <b>99.75</b>      | <b>99.59</b> | <b>99.67</b> | <b>99.71</b>      | <b>99.96</b> | <b>99.65</b>        | <b>99.57</b> | <b>99.91</b>     | <b>99.51</b> | <b>99.59</b> |

LOI – loss on ignition.
